# Supplementary material
Source: PubMed Central journal article supplement (PMC4890880)
Supplement: id5b00143_si_001.pdf [file id5b00143_si_001.pdf]

# Supporting Information

## A high-throughput luciferase-based assay for the discovery of therapeutics that prevent malaria

Justine Swann<sup>1</sup>, Victoria Corey<sup>1</sup>, Christina A. Scherer<sup>2</sup>, Nobutaka Kato<sup>2</sup>, Eamon Comer<sup>2</sup>, Micah Maetani<sup>2</sup>, Yevgeniya Antonova-Koch<sup>1</sup>, Christin Reimer<sup>1</sup>, Kerstin Gagaring<sup>3,&</sup>, Maureen Ibanez<sup>3,%</sup>, David Plouffe<sup>3</sup>, Anne-Marie Zeeman<sup>4</sup>, Clemens H. M. Kocken<sup>4</sup>, Case W. McNamara<sup>2,&</sup>, Stuart L. Schreiber<sup>2</sup>, Brice Campo<sup>5</sup>, Elizabeth A. Winzeler<sup>1</sup>, Stephan Meister<sup>1,#</sup>

<sup>1</sup> University of California, San Diego (UCSD), School of Medicine, Dept. Pediatrics, Pharmacology & Drug Discovery, 9500 Gilman Drive, La Jolla, CA 92093, USA

<sup>2</sup> The Broad Institute, 415 Main Street, Cambridge, MA 02142, USA

<sup>3</sup> Genomics Institute of the Novartis Research Foundation (GNF), 10675 John Jay Hopkins Drive, San Diego, CA 92121, USA

<sup>4</sup> Department of Parasitology, Biomedical Primate Research Centre, PO Box 3306, 2280 GH Rijswijk, The Netherlands

<sup>5</sup> Medicines for Malaria Venture (MMV), Meyrin 2015, Switzerland

& present address: California Institute for Biomedical Research (Calibr), San Diego, CA 92037, USA

% present address: Samumed, San Diego, CA 92121, USA

# Correspondence to [smeister@ucsd.edu](mailto:smeister@ucsd.edu)

**6 pages**

**4 Figures (Figure S1-S4)**

**2 Tables (Table S1 & S2)**

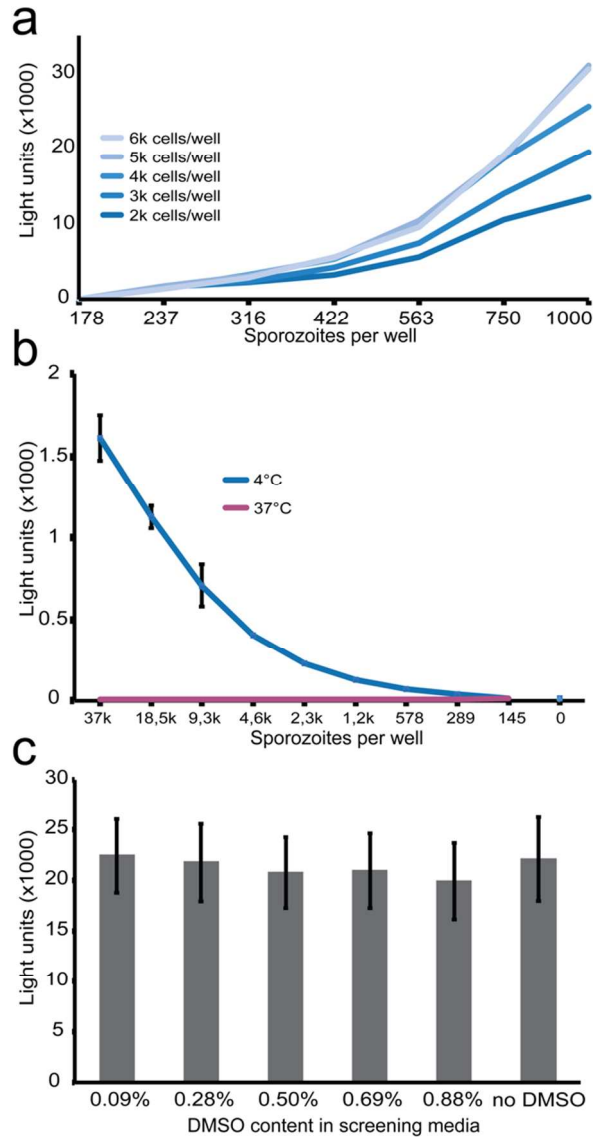

### Figure S1. Luciferase-based high-throughput screening assay optimization

a) Optimization of Pb-Luc sporozoite to host HepG2-A16-CD81<sup>EGFP</sup> cell ratio. Bioluminescence light output was measured for varying numbers of sporozoites in relation to cells per well. Higher cell numbers resulted in diminishing increases in light output. A ratio of 750 sporozoites to 3,000 cells was determined to be optimal for our assay. b) Luciferase light signal from sporozoites after 24 hours at 4°C and 37°C. In order to determine the contribution of extracellular sporozoites to the background signal intensity, we incubated sporozoites in cell culture media for 24 hours. After 24 hours at 37°C, there was negligible luminescent signal from even the highest concentration of sporozoites tested (37,000 per well), and thus extracellular sporozoites do not significantly contribute to background signal in our assay. c) Effect of different DMSO concentrations in the screening media on the malaria EEFs. The final DMSO concentration in the assay is 0.5%. DMSO concentrations up to 0.88% do not significantly alter EEF development. d) Light output of QuantiLum Recombinant Luciferase in 1536-well assay conditions. We chose 0.02 µl per well to replicate the typical light output from a Pb-Luc infected 1536 well. This was used to measure direct luciferase inhibition by the tested compound.

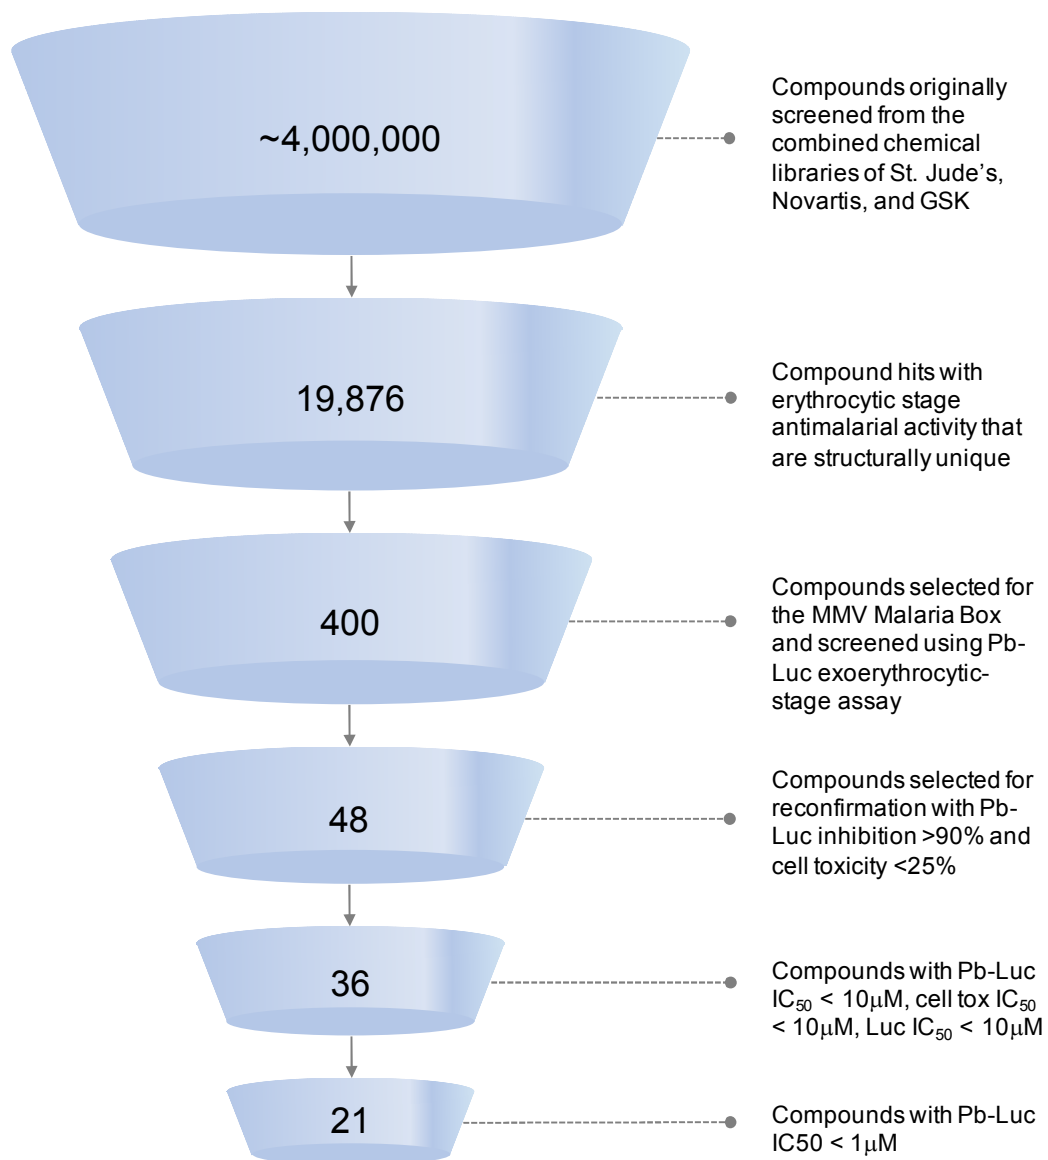

**Figure S2. The selection process for the MMV Malaria Box compounds and exoerythrocytic-stage active hits.**

Diagram illustrating the flow of the selection process for the inclusion of MMV Malaria Box compounds and the resulting malaria exoerythrocytic-stage active screening hits. The selection process begins with the creation of the MMV Malaria Box, a collection of 400 diverse compounds with erythrocytic-stage antimalarial activity derived from the combined screening of roughly 4 million compounds. Our high-throughput exoerythrocytic-stage screen identified 36 compounds with exoerythrocytic-stage activity of less than  $10 \mu M$ , and 21 compounds with exoerythrocytic-stage activity of less than  $1 \mu M$ .

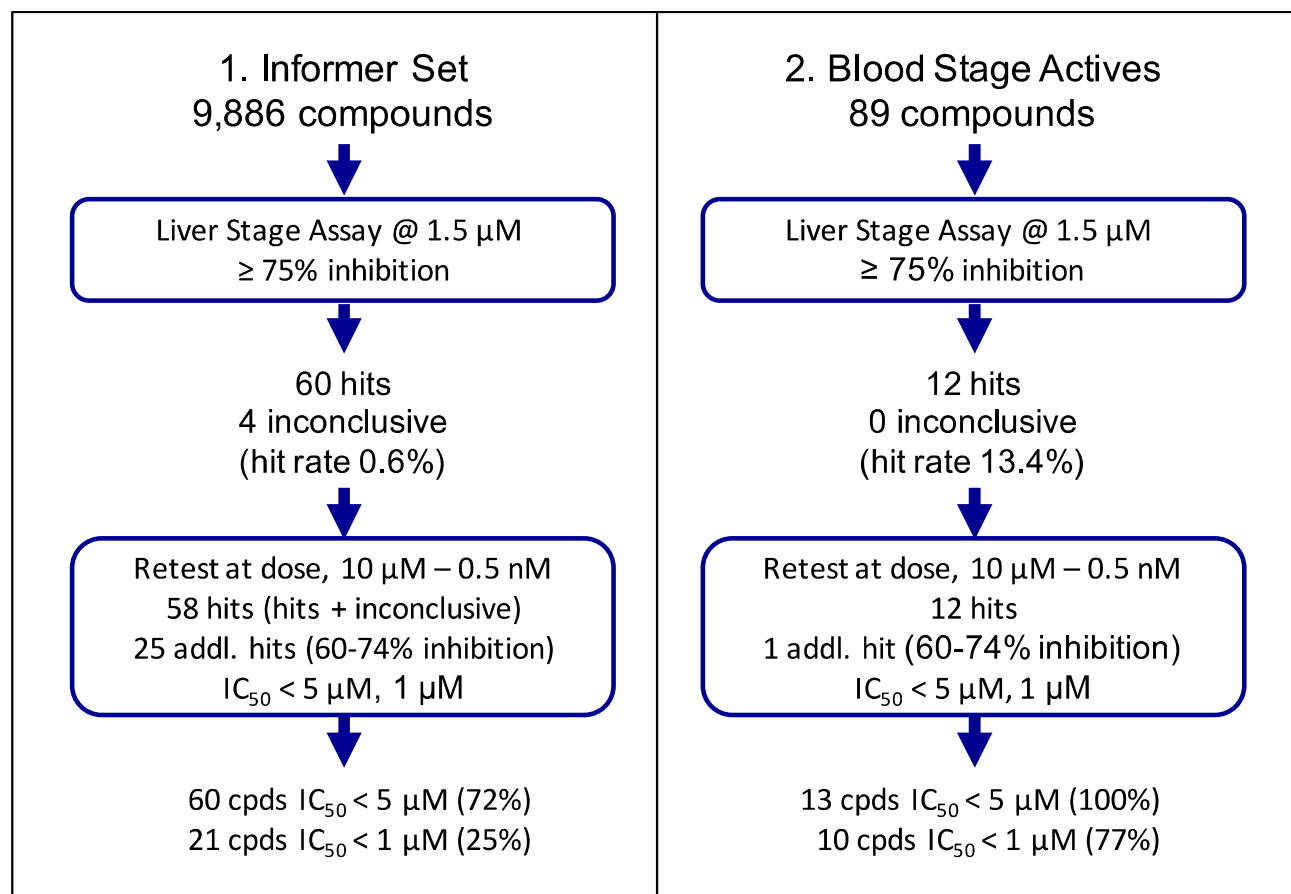

**Figure S3. Overview of the Broad Diversity-Oriented Synthesis Library Screen**

Screening pipeline for naïve informer set compounds and pre-selected erythrocytic-stage compounds. The hit rate for the naïve compounds set was 0.6%, while the hit rate for the pre-selected compounds was 13.4%.

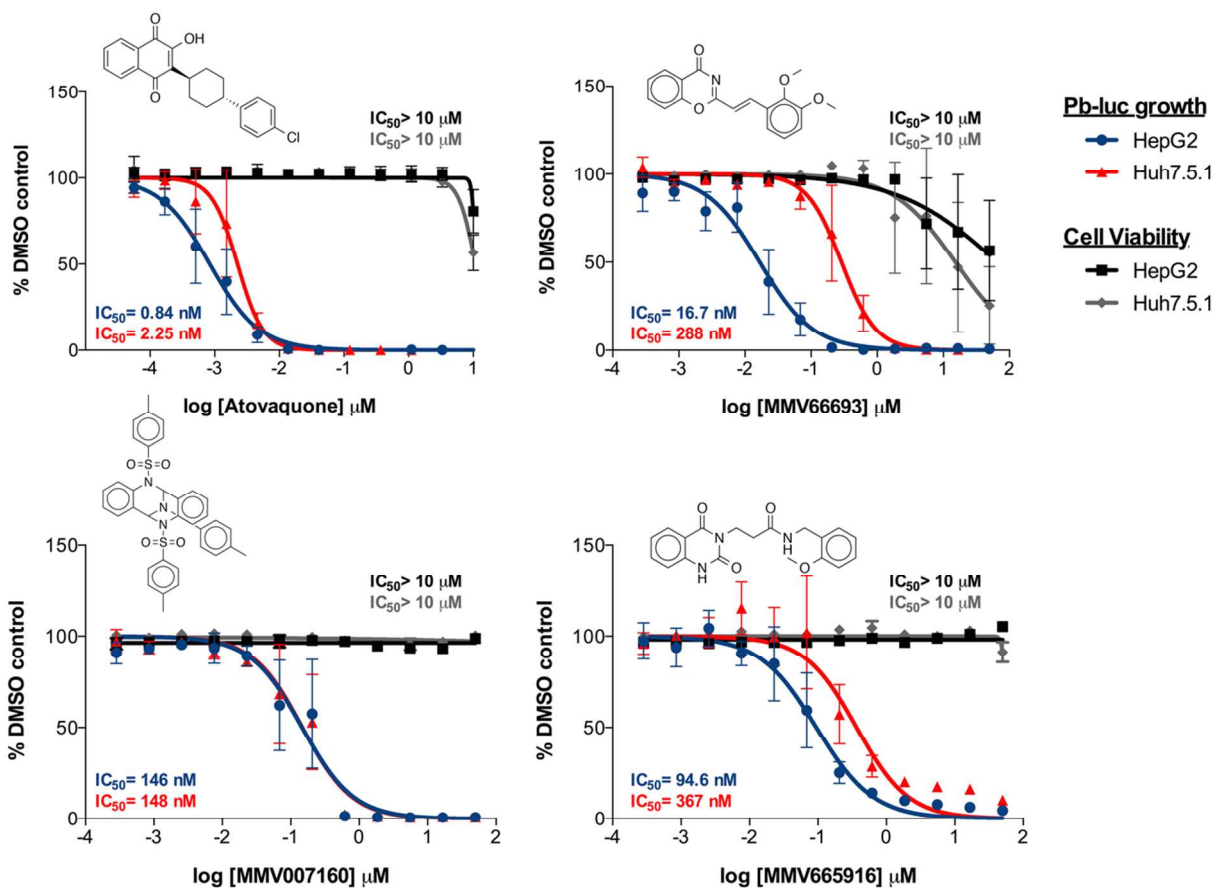

**Figure S4. Contribution of different host cell lines to compound potency.**

Serial dilutions of MMV66693, MMV007160, and MMV665916 were performed to calculate Pb-Luc growth in both HepG2 and Huh7.5.1 cell lines using the high-throughput luciferase-based assay. Cell viability was determined by monitoring HepG2 growth using a bioluminescent assay (Cell Titer Glo, Promega). Chemical structures for selected compounds are displayed.

Table S1. IC<sub>50</sub> data for validation set of 50 antimalarials

| Compound Class    | Common Name                     | <i>P. berghei</i> (liver) |                      | <i>P. falciparum</i> (blood) |                      |
|-------------------|---------------------------------|---------------------------|----------------------|------------------------------|----------------------|
|                   |                                 | IC <sub>50</sub> (nM)     | 95% CI (nM)          | IC <sub>50</sub> (nM)        | 95% CI (nM)          |
| 4-aminoquinolines | <b>Naphthoquine*</b>            | <b>391</b>                | 214 to 714           | <b>11.4</b>                  | <b>7.6 to 17.2</b>   |
|                   | AQ-13                           | 3160                      | 1067 to 9355         | 8.7                          | ND                   |
|                   | Amodiaquine                     | 1590                      | 433 to 5842          | >62500                       | ND                   |
|                   | Pyronaridine                    | 6791                      | 3037 to 12500        | 9.6                          | ND                   |
|                   | Piperaquine                     | >12500                    | ND                   | 72                           | ND                   |
|                   | Hydroxychloroquine              | >12500                    | ND                   | 13.9                         | ND                   |
|                   | Chloroquine                     | >12500                    | ND                   | 2.1                          | 1.7 to 2.7           |
| 8-aminoquinolines | <b>Primaquine*</b>              | <b>705</b>                | <b>321 to 1546</b>   | <b>695</b>                   | <b>398 to 1212</b>   |
|                   | NPC-1161B                       | 3551                      | 2141 to 5888         | 1320                         | 855 to 2040          |
|                   | Pamaquine                       | >12500                    | ND                   | >10000                       | 8435 to 36010        |
|                   | Tafenoquine                     | 5860                      | 3120 to 11000        | 2818                         | 1992 to 3986         |
| Amino alcohols    | Halofantrine                    | 2843                      | 974 to 8294          | 1.5                          | 1.2 to 1.9           |
|                   | Mefloquine (+ RS)               | 2334                      | 1348 to 4042         | 16.6                         | 13.1 to 21.1         |
|                   | Mefloquine (Racemic)            | 3059                      | 1.520 to 6.159       | <0.4                         | ND                   |
|                   | Quinidine                       | >12500                    | ND                   | 2.9                          | 2.3 to 3.8           |
|                   | Quinine sulfate dihydrate       | >12500                    | ND                   | 12.3                         | 4.2 to 35.8          |
|                   | Lumefantrine                    | >12500                    | ND                   | 7.3                          | 5.9 to 9.1           |
| Antibiotics       | <b>Trimethoprim*</b>            | <b>132</b>                | 53 to 324            | <b>5640</b>                  | <b>3396 to 9367</b>  |
|                   | Thiostrepton                    | 3127                      | 175 to 12500         | 1908                         | 950 to 3833          |
|                   | Doxycyclin                      | 11580                     | 3258 to 12500        | 8822                         | 5336 to 14590        |
|                   | Cis-Mirincamycin                | >12500                    | ND                   | 7560                         | 4457 to 12820        |
|                   | Trans-Mirincamycin              | >12500                    | ND                   | >10000                       | 10250 to 36050       |
|                   | Fosmidomycin                    | >12500                    | ND                   | >10000                       | 5784 to 18320        |
|                   | Clindamycin                     | >12500                    | ND                   | 198                          | 157 to 251           |
|                   | Tetracycline                    | >12500                    | ND                   | >10000                       | 13340 to 33130       |
| Azithromycin      | >12500                          | ND                        | 257                  | 199 to 331                   |                      |
| Antifolates       | <b>P218.HCl*</b>                | <b>0.9162</b>             | <b>0.6 to 1.4</b>    | <b>0.4</b>                   | <b>0.3 to 0.4</b>    |
|                   | <b>Pyrimethamine*</b>           | <b>5.1</b>                | <b>(Very wide)</b>   | <b>19.9</b>                  | <b>12.1 to 32.7</b>  |
|                   | <b>Cycloguanil*</b>             | <b>7</b>                  | <b>3.8 to 12.9</b>   | <b>3.1</b>                   | <b>2.4 to 3.9</b>    |
|                   | <b>Dapsone*</b>                 | <b>2435</b>               | <b>389 to 12500</b>  | <b>&gt;62500</b>             | <b>ND</b>            |
|                   | Chlorproguanil HCL              | 499.7                     | 160.8 to 1553        | 4716                         | 2697 to 8248         |
|                   | Proguanil HCL                   | 4560                      | 2173 to 9569         | 6239                         | 3426 to 11360        |
| Endoperoxidases   | <b>Artemisone*</b>              | <b>178.2</b>              | <b>50.4 to 630</b>   | <b>0.7</b>                   | <b>0.6 to 0.8</b>    |
|                   | <b>Artemisinin*</b>             | <b>1716</b>               | <b>379.9 to 7752</b> | <b>4.7</b>                   | <b>3.6 to 6.1</b>    |
|                   | <b>Artesunate*</b>              | <b>246</b>                | <b>131 to 462</b>    | <b>0.9</b>                   | <b>0.6 to 1.3</b>    |
|                   | <b>OZ277*</b>                   | <b>1639</b>               | <b>540.4 to 4972</b> | <b>2.3</b>                   | <b>1.9 to 2.7</b>    |
|                   | <b>Artemether*</b>              | <b>3144</b>               | <b>1186 to 8334</b>  | <b>&lt;0.4</b>               | <b>ND</b>            |
|                   | Artenimol                       | 1564                      | 981.2 to 2494        | <0.4                         | ND                   |
|                   | OZ439                           | 5236                      | 2774 to 9883         | 2.8                          | 2.5 to 3.2           |
| Others            | <b>Atovaquone*</b>              | <b>0.25</b>               | <b>0.2 to 0.3</b>    | <b>&lt;0.4</b>               | <b>ND</b>            |
|                   | <b>Cycloheximide*</b>           | <b>20.7</b>               | <b>10.6 to 40.4</b>  | <b>1.8</b>                   | <b>1.2 to 2.7</b>    |
|                   | <b>Methylene Blue*</b>          | <b>95.6</b>               | <b>47.3 to 193.2</b> | <b>7984</b>                  | <b>1308 to 48740</b> |
|                   | <b>Pentamidine*</b>             | <b>286.1</b>              | <b>130.8 to 626</b>  | <b>0.5</b>                   | <b>0.2 to 1.7</b>    |
|                   | Deferoxamine                    | >12500                    | ND                   | >10000                       | 11830 to 33830       |
|                   | Dehydroepiandrosterone sulphate | >12500                    | ND                   | >62500                       | ND                   |
|                   | N-acetyl-D-penicillamine        | >12500                    | ND                   | >62500                       | ND                   |
|                   | Riboflavin                      | >12500                    | ND                   | >62500                       | ND                   |

|                     |                          |            |                   |                  |           |
|---------------------|--------------------------|------------|-------------------|------------------|-----------|
| <b>Sulfonamides</b> | <b>Sulfadiazine*</b>     | <b>16</b>  | <b>2.0 to 126</b> | <b>&gt;62500</b> | <b>ND</b> |
|                     | <b>Sulfadoxine*</b>      | <b>74</b>  | <b>103 to 538</b> | <b>&gt;62500</b> | <b>ND</b> |
|                     | <b>Sulfamethoxazole*</b> | <b>216</b> | <b>75 to 625</b>  | <b>&gt;10000</b> | <b>ND</b> |

\* Antimalarial compounds with exoerythrocytic-stage activity (Pb-Luc IC<sub>50</sub> < 1000 nM)

**Table S2. Anti-*Plasmodium cynomolgi* exoerythrocytic-stage activity in primary hepatocytes for selected MMV Malaria Box Compounds.**

Small and large parasites are representative for hypnozoites and liver stage schizonts, respectively.

| <b>Compound</b> | <b><i>P. cynomolgi</i>, primary hepatocytes<br/>(% inhibition normalized to untreated control)</b> |               |                |                 |               |                |
|-----------------|----------------------------------------------------------------------------------------------------|---------------|----------------|-----------------|---------------|----------------|
|                 | Small<br>0.1<br>μM                                                                                 | Small<br>1 μM | Small<br>10 μM | Large<br>0.1 μM | Large<br>1 μM | Large<br>10 μM |
| KAI407          | -1                                                                                                 | 92            | 100            | 23              | 94            | 100            |
| Primaquine      | 4                                                                                                  | 19            | 24             | 1               | 3             | 13             |
| MMV006962       | -8                                                                                                 | 11            | 17             | 34              | 25            | 10             |
| MMV007160       | 17                                                                                                 | -25           | -11            | 17              | 14            | 0              |
| MMV007224       | 30                                                                                                 | 20            | 67             | 23              | 43            | 96             |
| MMV019066       | 10                                                                                                 | 11            | 3              | 3               | -2            | 5              |
| MMV665807       | 17                                                                                                 | 34            | 24             | 6               | 10            | 12             |
| MMV665916       | 20                                                                                                 | -13           | -15            | 6               | 2             | -13            |
| MMV666101       | 4                                                                                                  | 19            | 11             | 7               | 11            | 17             |
| MMV666693       | 29                                                                                                 | 16            | 30             | 22              | -3            | 15             |
